# Supplementary material for: Effects of hydrogen-rich water prepared by alternating-current-electrolysis on antioxidant activity, DNA oxidative injuries, and diabetes-related markers
Source: PubMed Central journal article supplement — Med Gas Res. 2020 Sep 30;10(3):114–21. doi: 10.4103/2045-9912.296041 (PMC8086617; doi:10.4103/2045-9912.296041), 2020-09-30
Supplement: MGR-10-114_Suppl1.pdf [file MGR-10-114_Suppl1.pdf]

平成21年9月15日

15th Sep 2009

Notification for Results of Research Ethics Review  
研究倫理審査結果通知書

To Emeritus Professor Kenji TAZAWA, Toyama Medical and Pharmaceutical  
富山医科薬科大学 名誉教授 田澤 賢次 殿 University

大阪物療専門学校 講師 朝田 良子 殿  
To Lecturer Ryoko ASADA, Osaka Butsuryo College

NPO-Corporate Japanese Center for Anti-Aging MedSciences  
特定非営利活動法人 日本老化防御医科学センター  
which is officially authenticated by the Hiroshima Prefecture Governme

(特定非営利活動促進法に基づき2002年広島県庁に認証されたNPO法人)

Committee for Research Ethics, Chairperson

研究倫理委員会 委員長

Osaka City University School of Medicine, formerly Professor  
大阪市立大学 医学部 元教授

Official seal & Signature  
Katsuhiko KAGEYAMA 蔭山 勝弘

貴殿が届け出た下記の研究課題について、研究倫理を審査した結果、下記6項目の観点から、「健康増進と老化防御に資する有意義な基礎医学研究」であり、「研究倫理に反する問題点や支障は見当たらない」とみなし、承認することとする。

※Approval number #01S02

※承認番号…#01S02 has been officially approved because of no problem for research ethics and proposal of significant basic medicine research.

- (1) 研究題目…「水素飲水による糖尿病マーカーへの影響」  
(1) Research Theme "Effects of hydrogen water drinking on diabetes-related markers"
- (2) 目的…水素飲水が、「糖尿病を改善するか」、さらに、その要因を調べる。  
(2) Purpose It is examined whether hydrogen water drinking will improve diabetes and what mechanism.
- (3) 研究内容…研究実施同意書を提出した糖尿病予備軍(未治療)の方10名に、水素水を飲んでもらい、糖尿病マーカーを血液検査して、有効性を判定し、機序を解析する。  
(3) Research Contents The informed consents were proposed by ten subjects, who receive no therapy but slightly showed diabetes-symptoms, and will drink hydrogen water followed by examination for diverse diabetes-related markers, which makes the effect judgement.
- (4) 研究の安全性…①当該水素飲水は厚生労働省の水道法に定める水質基準を準拠している(社団法人 新潟県環境衛生中央研究所#09-21-09-00602-0000)、②広く普及した市販品を使用する、③臨床検査は非侵襲であり、無出血・無痛・無痕跡を基本としている。  
(4) Research Safety ①The concerned hydrogen water clears the water quality criteria ruled by the tap water law. ②The concerned hydrogen water apparatus is widespread for abundant people and commercially available. ③The clinical examination is Non-Invasive such as No-Hemorrhage, No-Pain and No-Scar, as the fundamentals.
- (5) 審査指針…①世界医師会のヘルシンキ宣言による倫理規範に準拠している、②日本での個人情報保護法(平成15年法律第57号)第8条などによる個人情報保護に抵触しない、③医学・医療専門家、人文・社会科学有識者、外部委員、男女両方を含む委員構成を包括する委員会を審査した。  
(5) Review Orientation ①Helsinki Declaration is fulfilled. ②The personal information protection law (Japan 57th law, 2003) Article 8 is not violated. ③The concerned committee is composed people for humanities and society, outsider people and both of male/female.
- (6) 倫理的配慮…研究結果の発表時を含め、被験者の個人名や個人を特定できるような情報は一切公表せず、当該研究固有番号をつけて匿名化して管理し、被験者がこの研究に参加していることや検査結果が第三者に知られることは避止する措置が講じられている。  
(6) Ethical Considerations Personal names of subjects or person-specifying informations are ruled not to be announced even upon presentation of the research results, and regulated to be managed by making the anonymous number/symbol, which will avoid the third party to know the subjects' names, their participation in the concerned research and their examination results as the personal informations.
